# Supplementary material for: What kind of interactions we may get moving from zwitter to “dritter” ions: C–O⋯Re(O4) and Re–O⋯Re(O4) anion⋯anion interactions make structural difference between l-histidinium perrhenate and pertechnetate
Source: Royal Society of Chemistry journal article supplement (doi:10.1039/d3ce01164j), 2023-12-01
Supplement: d3ce01164j1.pdf [file d3ce01164j1.pdf]

## Electronic supplementary materials for the paper

### **What kind of interactions we may get moving from zwitter to “dritter” ions: C–O···Re(O<sub>4</sub>) and Re–O···Re(O<sub>4</sub>) anion···anion interactions make structural difference between L-histidinium perrhenate and pertechnetate**

Anton P. Novikov,\* Alexey V. Safonov, Konstantin E. German and Mikhail S. Grigoriev

Frumkin Institute of Physical Chemistry and Electrochemistry, Russian Academy of Sciences,  
Leninsky Prosp., 31 Bldg 4, Moscow 119071, Russian Federation

Correspondence: [tony.novickoff@yandex.ru](mailto:tony.novickoff@yandex.ru)

#### TABLE OF CONTENTS

|                                                 |          |
|-------------------------------------------------|----------|
| <b>1. XRD part</b> .....                        | <b>2</b> |
| <b>2. Non-valent interactions details</b> ..... | <b>8</b> |

## 1. XRD part

**Table S1. Bond Lengths for 1.**

| Atom | Atom | Length/Å | Atom | Atom | Length/Å |
|------|------|----------|------|------|----------|
| Re1  | O11  | 1.733(4) | N21  | C22  | 1.502(7) |
| Re1  | O12  | 1.722(4) | N22  | C24  | 1.380(7) |
| Re1  | O13  | 1.724(4) | N22  | C25  | 1.325(7) |
| Re1  | O14  | 1.729(4) | N23  | C25  | 1.336(8) |
| Re2  | O21  | 1.733(4) | N23  | C26  | 1.378(8) |
| Re2  | O22  | 1.729(5) | N31  | C32  | 1.496(7) |
| Re2  | O23  | 1.722(4) | N32  | C34  | 1.389(8) |
| Re2  | O24  | 1.725(4) | N32  | C35  | 1.330(7) |
| Re3  | O31  | 1.733(4) | N33  | C35  | 1.318(8) |
| Re3  | O32  | 1.736(4) | N33  | C36  | 1.366(8) |
| Re3  | O33  | 1.725(4) | C11  | C12  | 1.541(8) |
| Re3  | O34  | 1.729(4) | C12  | C13  | 1.524(8) |
| O15  | C11  | 1.260(7) | C13  | C14  | 1.487(8) |
| O16  | C11  | 1.250(7) | C14  | C16  | 1.369(8) |
| O25  | C21  | 1.269(7) | C21  | C22  | 1.535(8) |
| O26  | C21  | 1.248(7) | C22  | C23  | 1.529(8) |
| O35  | C31  | 1.264(7) | C23  | C24  | 1.483(8) |
| O36  | C31  | 1.246(7) | C24  | C26  | 1.376(8) |
| N11  | C12  | 1.499(7) | C31  | C32  | 1.541(7) |
| N12  | C14  | 1.380(7) | C32  | C33  | 1.530(8) |
| N12  | C15  | 1.326(7) | C33  | C34  | 1.494(7) |
| N13  | C15  | 1.325(8) | C34  | C36  | 1.356(8) |
| N13  | C16  | 1.382(8) |      |      |          |

**Table S2. Bond Angles for 1.**

| Atom | Atom | Atom | Angle/°    | Atom | Atom | Atom | Angle/°  |
|------|------|------|------------|------|------|------|----------|
| O12  | Re1  | O11  | 110.5(2)   | C14  | C13  | C12  | 114.5(5) |
| O12  | Re1  | O13  | 110.2(2)   | N12  | C14  | C13  | 123.4(5) |
| O12  | Re1  | O14  | 109.5(2)   | C16  | C14  | N12  | 106.6(5) |
| O13  | Re1  | O11  | 108.1(2)   | C16  | C14  | C13  | 130.0(6) |
| O13  | Re1  | O14  | 108.2(2)   | N13  | C15  | N12  | 108.8(5) |
| O14  | Re1  | O11  | 110.2(2)   | C14  | C16  | N13  | 106.5(5) |
| O22  | Re2  | O21  | 107.8(2)   | O25  | C21  | C22  | 115.9(5) |
| O23  | Re2  | O21  | 109.1(2)   | O26  | C21  | O25  | 127.2(6) |
| O23  | Re2  | O22  | 110.2(2)   | O26  | C21  | C22  | 116.8(5) |
| O23  | Re2  | O24  | 110.3(2)   | N21  | C22  | C21  | 109.0(5) |
| O24  | Re2  | O21  | 108.5(2)   | N21  | C22  | C23  | 111.7(5) |
| O24  | Re2  | O22  | 110.9(2)   | C23  | C22  | C21  | 112.1(5) |
| O31  | Re3  | O32  | 109.7(2)   | C24  | C23  | C22  | 112.9(5) |
| O33  | Re3  | O31  | 111.2(2)   | N22  | C24  | C23  | 123.4(5) |
| O33  | Re3  | O32  | 112.1(2)   | C26  | C24  | N22  | 106.0(5) |
| O33  | Re3  | O34  | 108.5(2)   | C26  | C24  | C23  | 130.6(6) |
| O34  | Re3  | O31  | 108.75(19) | N22  | C25  | N23  | 108.8(5) |
| O34  | Re3  | O32  | 106.4(2)   | C24  | C26  | N23  | 107.2(5) |
| C15  | N12  | C14  | 109.1(5)   | O35  | C31  | C32  | 115.7(5) |
| C15  | N13  | C16  | 109.0(5)   | O36  | C31  | O35  | 127.6(5) |
| C25  | N22  | C24  | 109.5(5)   | O36  | C31  | C32  | 116.6(5) |
| C25  | N23  | C26  | 108.4(5)   | N31  | C32  | C31  | 108.7(5) |

|     |     |     |          |     |     |     |          |
|-----|-----|-----|----------|-----|-----|-----|----------|
| C35 | N32 | C34 | 108.5(5) | N31 | C32 | C33 | 111.7(5) |
| C35 | N33 | C36 | 108.3(5) | C33 | C32 | C31 | 112.9(5) |
| O15 | C11 | C12 | 115.8(5) | C34 | C33 | C32 | 112.7(5) |
| O16 | C11 | O15 | 127.5(6) | N32 | C34 | C33 | 121.9(5) |
| O16 | C11 | C12 | 116.7(5) | C36 | C34 | N32 | 105.6(5) |
| N11 | C12 | C11 | 109.1(5) | C36 | C34 | C33 | 132.5(6) |
| N11 | C12 | C13 | 111.4(5) | N33 | C35 | N32 | 109.3(5) |
| C13 | C12 | C11 | 109.9(5) | C34 | C36 | N33 | 108.3(5) |

**Table S3.** Hydrogen Bonds for **1**.

| D   | H    | A                 | d(D-H)/Å | d(H-A)/Å | d(D-A)/Å | D-H-A/° |
|-----|------|-------------------|----------|----------|----------|---------|
| N11 | H11A | O21               | 0.91     | 2.08     | 2.946(7) | 158.7   |
| N11 | H11B | O31 <sup>1</sup>  | 0.91     | 1.92     | 2.801(6) | 163.4   |
| N11 | H11C | O32 <sup>2</sup>  | 0.91     | 2.11     | 2.950(7) | 153.1   |
| N12 | H12  | O26 <sup>3</sup>  | 0.88     | 1.78     | 2.651(7) | 172.8   |
| N13 | H13  | O15 <sup>4</sup>  | 0.88     | 1.77     | 2.616(7) | 160.1   |
| N21 | H21A | O34 <sup>5</sup>  | 0.91     | 2.42     | 3.264(7) | 154.0   |
| N21 | H21B | O24               | 0.91     | 1.89     | 2.799(6) | 173.7   |
| N21 | H21C | O11 <sup>6</sup>  | 0.91     | 1.94     | 2.830(6) | 165.8   |
| N22 | H22  | O36 <sup>7</sup>  | 0.88     | 1.78     | 2.645(6) | 165.4   |
| N23 | H23  | O25 <sup>4</sup>  | 0.88     | 1.78     | 2.653(7) | 170.8   |
| N31 | H31A | O13 <sup>8</sup>  | 0.91     | 2.30     | 2.839(6) | 118.0   |
| N31 | H31B | O14               | 0.91     | 1.92     | 2.787(6) | 158.2   |
| N31 | H31C | O22 <sup>9</sup>  | 0.91     | 2.45     | 3.087(7) | 127.7   |
| N31 | H31C | O34               | 0.91     | 2.08     | 2.844(6) | 140.5   |
| N32 | H32  | O16               | 0.88     | 1.81     | 2.684(7) | 169.4   |
| N33 | H33  | O35 <sup>10</sup> | 0.88     | 1.80     | 2.680(6) | 176.6   |
| C13 | H13A | O36               | 0.99     | 2.38     | 3.189(7) | 138.0   |
| C13 | H13B | O12 <sup>8</sup>  | 0.99     | 2.39     | 3.219(7) | 140.4   |
| C15 | H15  | O23 <sup>4</sup>  | 0.95     | 2.41     | 3.235(8) | 144.8   |
| C23 | H23A | O16 <sup>6</sup>  | 0.99     | 2.44     | 3.252(7) | 138.4   |
| C25 | H25  | O33 <sup>1</sup>  | 0.95     | 2.41     | 3.053(7) | 125.1   |
| C26 | H26  | O13 <sup>6</sup>  | 0.95     | 2.42     | 3.143(8) | 132.4   |
| C33 | H33A | O26 <sup>11</sup> | 0.99     | 2.54     | 3.377(7) | 142.4   |
| C35 | H35  | O12 <sup>12</sup> | 0.95     | 2.37     | 3.071(7) | 130.1   |
| C36 | H36  | O34               | 0.95     | 2.43     | 3.016(8) | 119.6   |

<sup>1</sup>3/2-X,1-Y,-1/2+Z; <sup>2</sup>1-X,1/2+Y,3/2-Z; <sup>3</sup>1-X,-1/2+Y,1/2-Z; <sup>4</sup>1+X,+Y,+Z; <sup>5</sup>1/2-X,1-Y,-1/2+Z; <sup>6</sup>1-X,1/2+Y,1/2-Z; <sup>7</sup>-1/2+X,3/2-Y,1-Z; <sup>8</sup>1/2+X,1/2-Y,1-Z; <sup>9</sup>3/2-X,1-Y,1/2+Z; <sup>10</sup>-1+X,+Y,+Z; <sup>11</sup>1/2+X,3/2-Y,1-Z; <sup>12</sup>-1/2+X,1/2-Y,1-Z

**Table S4.** Torsion Angles for **1**.

| A   | B   | C   | D   | Angle/°   | A   | B   | C   | D   | Angle/°   |
|-----|-----|-----|-----|-----------|-----|-----|-----|-----|-----------|
| O15 | C11 | C12 | N11 | 5.9(7)    | C15 | N12 | C14 | C13 | 179.3(5)  |
| O15 | C11 | C12 | C13 | 128.4(6)  | C15 | N12 | C14 | C16 | -0.9(7)   |
| O16 | C11 | C12 | N11 | -174.0(5) | C15 | N13 | C16 | C14 | 0.5(7)    |
| O16 | C11 | C12 | C13 | -51.5(7)  | C16 | N13 | C15 | N12 | -1.1(7)   |
| O25 | C21 | C22 | N21 | 22.4(7)   | C21 | C22 | C23 | C24 | 177.4(5)  |
| O25 | C21 | C22 | C23 | 146.5(5)  | C22 | C23 | C24 | N22 | -65.4(8)  |
| O26 | C21 | C22 | N21 | -159.4(5) | C22 | C23 | C24 | C26 | 112.2(7)  |
| O26 | C21 | C22 | C23 | -35.3(7)  | C23 | C24 | C26 | N23 | -177.6(6) |
| O35 | C31 | C32 | N31 | 26.4(7)   | C24 | N22 | C25 | N23 | 0.7(7)    |

|     |     |     |     |           |     |     |     |     |           |
|-----|-----|-----|-----|-----------|-----|-----|-----|-----|-----------|
| O35 | C31 | C32 | C33 | 150.9(5)  | C25 | N22 | C24 | C23 | 177.5(5)  |
| O36 | C31 | C32 | N31 | -157.6(5) | C25 | N22 | C24 | C26 | -0.6(7)   |
| O36 | C31 | C32 | C33 | -33.1(7)  | C25 | N23 | C26 | C24 | 0.2(7)    |
| N11 | C12 | C13 | C14 | -60.9(7)  | C26 | N23 | C25 | N22 | -0.6(7)   |
| N12 | C14 | C16 | N13 | 0.2(6)    | C31 | C32 | C33 | C34 | 173.9(5)  |
| N21 | C22 | C23 | C24 | -60.0(7)  | C32 | C33 | C34 | N32 | -68.9(7)  |
| N22 | C24 | C26 | N23 | 0.3(7)    | C32 | C33 | C34 | C36 | 110.3(7)  |
| N31 | C32 | C33 | C34 | -63.3(7)  | C33 | C34 | C36 | N33 | -178.2(6) |
| N32 | C34 | C36 | N33 | 1.0(7)    | C34 | N32 | C35 | N33 | 1.8(7)    |
| C11 | C12 | C13 | C14 | 178.0(5)  | C35 | N32 | C34 | C33 | 177.6(5)  |
| C12 | C13 | C14 | N12 | -68.6(7)  | C35 | N32 | C34 | C36 | -1.7(7)   |
| C12 | C13 | C14 | C16 | 111.6(7)  | C35 | N33 | C36 | C34 | 0.1(7)    |
| C13 | C14 | C16 | N13 | -180.0(5) | C36 | N33 | C35 | N32 | -1.2(7)   |
| C14 | N12 | C15 | N13 | 1.3(7)    |     |     |     |     |           |

**Table S5.** Bond Lengths for **2**.

| Atom | Atom | Length/Å  | Atom | Atom | Length/Å  |
|------|------|-----------|------|------|-----------|
| Tc1  | O12  | 1.678(16) | N12  | C15  | 1.34(2)   |
| Tc1  | O14  | 1.752(14) | O15  | C11  | 1.279(19) |
| Tc1  | O13  | 1.674(15) | C41  | C42  | 1.55(2)   |
| Tc1  | O11  | 1.688(15) | N31  | C32  | 1.48(2)   |
| Tc2  | O21  | 1.711(13) | C11  | C12  | 1.53(2)   |
| Tc2  | O22  | 1.714(14) | N22  | C24  | 1.38(2)   |
| Tc2  | O23  | 1.720(13) | N22  | C25  | 1.32(2)   |
| Tc2  | O24  | 1.698(14) | N21  | C22  | 1.49(2)   |
| Tc3  | O31  | 1.701(13) | C26  | N23  | 1.39(2)   |
| Tc3  | O33  | 1.674(15) | C26  | C24  | 1.38(2)   |
| Tc3  | O32  | 1.71(2)   | C46  | C44  | 1.38(2)   |
| Tc3  | O34  | 1.667(16) | C46  | N43  | 1.38(2)   |
| Tc4  | O44  | 1.708(15) | C21  | C22  | 1.52(2)   |
| Tc4  | O42  | 1.698(14) | N23  | C25  | 1.34(3)   |
| Tc4  | O43  | 1.726(14) | N11  | C12  | 1.49(2)   |
| Tc4  | O41  | 1.722(14) | C44  | N42  | 1.39(2)   |
| O36  | C31  | 1.219(18) | C44  | C43  | 1.51(2)   |
| O46  | C41  | 1.24(2)   | N41  | C42  | 1.49(2)   |
| O26  | C21  | 1.26(2)   | C34  | C33  | 1.48(2)   |
| O25  | C21  | 1.26(2)   | C34  | C36  | 1.36(2)   |
| O16  | C11  | 1.216(19) | N42  | C45  | 1.33(2)   |
| O45  | C41  | 1.26(2)   | C42  | C43  | 1.53(2)   |
| O35  | C31  | 1.274(17) | C16  | N13  | 1.42(2)   |
| N33  | C36  | 1.38(2)   | C24  | C23  | 1.50(2)   |
| N33  | C35  | 1.35(2)   | N13  | C15  | 1.29(2)   |
| N32  | C34  | 1.38(2)   | C22  | C23  | 1.54(2)   |
| N32  | C35  | 1.33(2)   | C31  | C32  | 1.52(2)   |
| C14  | N12  | 1.38(2)   | N43  | C45  | 1.30(2)   |
| C14  | C16  | 1.37(2)   | C32  | C33  | 1.55(2)   |
| C14  | C13  | 1.49(2)   | C13  | C12  | 1.56(2)   |

**Table S6.** Bond Angles for **2**.

| Atom | Atom | Atom | Angle/°   | Atom | Atom | Atom | Angle/°   |
|------|------|------|-----------|------|------|------|-----------|
| O12  | Tc1  | O14  | 108.6(8)  | O25  | C21  | O26  | 127.5(15) |
| O12  | Tc1  | O11  | 111.0(10) | O25  | C21  | C22  | 118.0(15) |

|     |     |     |           |     |     |     |           |
|-----|-----|-----|-----------|-----|-----|-----|-----------|
| O13 | Tc1 | O12 | 108.5(8)  | C25 | N23 | C26 | 109.1(16) |
| O13 | Tc1 | O14 | 111.4(7)  | C46 | C44 | N42 | 106.4(16) |
| O13 | Tc1 | O11 | 108.2(10) | C46 | C44 | C43 | 130.3(15) |
| O11 | Tc1 | O14 | 109.1(8)  | N42 | C44 | C43 | 122.7(16) |
| O21 | Tc2 | O22 | 109.6(6)  | N32 | C34 | C33 | 124.4(15) |
| O21 | Tc2 | O23 | 107.7(6)  | C36 | C34 | N32 | 105.9(15) |
| O22 | Tc2 | O23 | 111.4(7)  | C36 | C34 | C33 | 129.7(16) |
| O24 | Tc2 | O21 | 108.0(7)  | C45 | N42 | C44 | 108.8(16) |
| O24 | Tc2 | O22 | 109.8(6)  | N41 | C42 | C41 | 111.5(13) |
| O24 | Tc2 | O23 | 110.3(7)  | N41 | C42 | C43 | 112.7(13) |
| O31 | Tc3 | O32 | 108.2(8)  | C43 | C42 | C41 | 109.8(13) |
| O33 | Tc3 | O31 | 110.7(7)  | C14 | C16 | N13 | 105.6(14) |
| O33 | Tc3 | O32 | 109.2(11) | N22 | C24 | C23 | 123.0(15) |
| O34 | Tc3 | O31 | 107.5(8)  | C26 | C24 | N22 | 106.4(15) |
| O34 | Tc3 | O33 | 111.3(11) | C26 | C24 | C23 | 130.5(16) |
| O34 | Tc3 | O32 | 109.9(12) | C15 | N13 | C16 | 108.7(15) |
| O44 | Tc4 | O43 | 109.1(7)  | N21 | C22 | C21 | 112.6(14) |
| O44 | Tc4 | O41 | 110.2(7)  | N21 | C22 | C23 | 111.3(13) |
| O42 | Tc4 | O44 | 110.0(8)  | C21 | C22 | C23 | 107.4(12) |
| O42 | Tc4 | O43 | 109.4(8)  | O36 | C31 | O35 | 126.3(14) |
| O42 | Tc4 | O41 | 109.0(8)  | O36 | C31 | C32 | 116.8(13) |
| O41 | Tc4 | O43 | 109.1(7)  | O35 | C31 | C32 | 116.8(13) |
| C35 | N33 | C36 | 107.5(14) | C45 | N43 | C46 | 110.6(15) |
| C35 | N32 | C34 | 109.8(14) | N31 | C32 | C31 | 114.4(12) |
| N12 | C14 | C13 | 123.9(15) | N31 | C32 | C33 | 110.7(12) |
| C16 | C14 | N12 | 107.5(13) | C31 | C32 | C33 | 109.7(12) |
| C16 | C14 | C13 | 128.6(16) | C34 | C33 | C32 | 113.3(13) |
| C15 | N12 | C14 | 107.9(15) | C44 | C43 | C42 | 113.8(13) |
| O46 | C41 | O45 | 127.2(15) | C14 | C13 | C12 | 114.9(13) |
| O46 | C41 | C42 | 115.4(15) | C24 | C23 | C22 | 112.0(13) |
| O45 | C41 | C42 | 117.4(14) | C11 | C12 | C13 | 107.8(12) |
| O16 | C11 | O15 | 125.9(14) | N11 | C12 | C11 | 112.1(13) |
| O16 | C11 | C12 | 116.9(14) | N11 | C12 | C13 | 109.3(13) |
| O15 | C11 | C12 | 117.2(14) | C34 | C36 | N33 | 108.1(15) |
| C25 | N22 | C24 | 110.4(15) | N43 | C45 | N42 | 108.6(16) |
| C24 | C26 | N23 | 105.9(17) | N22 | C25 | N23 | 108.1(17) |
| C44 | C46 | N43 | 105.5(15) | N13 | C15 | N12 | 110.3(16) |
| O26 | C21 | C22 | 114.4(15) | N32 | C35 | N33 | 108.4(14) |

**Table S7.** Hydrogen Bonds for **2**.

| D   | H    | A                | d(D-H)/Å | d(H-A)/Å | d(D-A)/Å  | D-H-A/° |
|-----|------|------------------|----------|----------|-----------|---------|
| N33 | H33  | O42 <sup>1</sup> | 0.88     | 2.26     | 2.94(2)   | 134.5   |
| N33 | H33  | O12 <sup>2</sup> | 0.88     | 2.25     | 2.81(2)   | 120.8   |
| N32 | H32  | O15 <sup>3</sup> | 0.88     | 1.96     | 2.823(17) | 166.9   |
| N12 | H12  | O45 <sup>1</sup> | 0.88     | 2.08     | 2.947(19) | 170.5   |
| N31 | H31A | O25 <sup>1</sup> | 0.91     | 2.09     | 2.840(17) | 138.8   |
| N31 | H31B | O46 <sup>1</sup> | 0.91     | 1.93     | 2.743(17) | 147.2   |
| N31 | H31C | O22 <sup>3</sup> | 0.91     | 2.01     | 2.856(19) | 153.4   |
| N22 | H22  | O35              | 0.88     | 1.94     | 2.815(19) | 173.8   |
| N21 | H21A | O44              | 0.91     | 2.00     | 2.85(2)   | 154.9   |
| N21 | H21B | O45 <sup>3</sup> | 0.91     | 2.22     | 2.997(17) | 142.5   |
| N21 | H21C | O16 <sup>4</sup> | 0.91     | 1.92     | 2.754(18) | 151.8   |
| N23 | H23  | O32 <sup>5</sup> | 0.88     | 1.92     | 2.69(2)   | 146.0   |

|     |      |                  |      |      |           |       |
|-----|------|------------------|------|------|-----------|-------|
| N11 | H11A | O31              | 0.91 | 2.06 | 2.859(18) | 146.1 |
| N11 | H11B | O35              | 0.91 | 2.17 | 3.063(17) | 166.1 |
| N11 | H11C | O26              | 0.91 | 1.88 | 2.768(19) | 164.5 |
| N41 | H41A | O15              | 0.91 | 2.09 | 2.920(17) | 151.1 |
| N41 | H41B | O36 <sup>6</sup> | 0.91 | 1.87 | 2.751(17) | 163.1 |
| N41 | H41C | O14              | 0.91 | 2.09 | 2.832(19) | 137.6 |
| N42 | H42  | O26              | 0.88 | 2.02 | 2.78(2)   | 144.9 |
| C16 | H16  | O13              | 0.95 | 2.38 | 3.09(2)   | 131.3 |
| N13 | H13  | O21 <sup>3</sup> | 0.88 | 2.22 | 2.845(19) | 127.4 |
| N13 | H13  | O41 <sup>7</sup> | 0.88 | 2.21 | 3.01(2)   | 149.9 |
| N43 | H43  | O23 <sup>8</sup> | 0.88 | 2.22 | 3.10(2)   | 174.9 |
| C12 | H12A | O46 <sup>1</sup> | 1.00 | 2.49 | 3.180(19) | 125.8 |
| C36 | H36  | O33              | 0.95 | 2.25 | 3.03(2)   | 139.5 |
| C45 | H45  | O34              | 0.95 | 2.22 | 2.90(3)   | 128.3 |
| C25 | H25  | O21 <sup>3</sup> | 0.95 | 2.31 | 3.06(2)   | 135.7 |
| C35 | H35  | O44 <sup>1</sup> | 0.95 | 2.53 | 3.15(2)   | 123.1 |

<sup>1</sup>+X,1+Y,+Z; <sup>2</sup>+X,1+Y,-1+Z; <sup>3</sup>-1+X,1+Y,+Z; <sup>4</sup>-1+X,+Y,+Z; <sup>5</sup>-1+X,+Y,1+Z; <sup>6</sup>1+X,-1+Y,+Z; <sup>7</sup>+X,+Y,1+Z; <sup>8</sup>+X,+Y,-1+Z

**Table S8.** Torsion Angles for **2**.

| A   | B   | C   | D   | Angle/°   | A   | B   | C   | D   | Angle/°    |
|-----|-----|-----|-----|-----------|-----|-----|-----|-----|------------|
| O36 | C31 | C32 | N31 | 173.6(12) | C46 | C44 | N42 | C45 | 0(2)       |
| O36 | C31 | C32 | C33 | -61.4(16) | C46 | C44 | C43 | C42 | 148.7(19)  |
| O46 | C41 | C42 | N41 | 159.2(14) | C46 | N43 | C45 | N42 | 2(2)       |
| O46 | C41 | C42 | C43 | -75.0(18) | C21 | C22 | C23 | C24 | -178.9(14) |
| O26 | C21 | C22 | N21 | 161.3(14) | N23 | C26 | C24 | N22 | 1(2)       |
| O26 | C21 | C22 | C23 | -75.8(17) | N23 | C26 | C24 | C23 | -177.0(18) |
| O25 | C21 | C22 | N21 | -18(2)    | C44 | C46 | N43 | C45 | -1(2)      |
| O25 | C21 | C22 | C23 | 104.6(17) | C44 | N42 | C45 | N43 | -1(2)      |
| O16 | C11 | C12 | N11 | 165.1(14) | N41 | C42 | C43 | C44 | -57.9(19)  |
| O16 | C11 | C12 | C13 | -74.7(18) | C34 | N32 | C35 | N33 | 5(2)       |
| O45 | C41 | C42 | N41 | -19.4(19) | N42 | C44 | C43 | C42 | -41(3)     |
| O45 | C41 | C42 | C43 | 106.3(17) | C16 | C14 | N12 | C15 | 1(2)       |
| O35 | C31 | C32 | N31 | -6.0(18)  | C16 | C14 | C13 | C12 | 133.6(19)  |
| O35 | C31 | C32 | C33 | 119.1(15) | C16 | N13 | C15 | N12 | -2(2)      |
| N32 | C34 | C33 | C32 | -56(2)    | C24 | N22 | C25 | N23 | -1(2)      |
| N32 | C34 | C36 | N33 | -0.9(19)  | C24 | C26 | N23 | C25 | -1(2)      |
| C14 | N12 | C15 | N13 | 1(2)      | C31 | C32 | C33 | C34 | 175.4(13)  |
| C14 | C16 | N13 | C15 | 2(2)      | N43 | C46 | C44 | N42 | 1(2)       |
| C14 | C13 | C12 | C11 | 174.7(14) | N43 | C46 | C44 | C43 | 172.1(18)  |
| C14 | C13 | C12 | N11 | -63.3(19) | C33 | C34 | C36 | N33 | -178.8(17) |
| N12 | C14 | C16 | N13 | -2.0(19)  | C43 | C44 | N42 | C45 | -172.0(17) |
| N12 | C14 | C13 | C12 | -47(2)    | C13 | C14 | N12 | C15 | -178.1(16) |
| O15 | C11 | C12 | N11 | -11.6(19) | C13 | C14 | C16 | N13 | 177.0(17)  |
| O15 | C11 | C12 | C13 | 108.6(16) | C36 | N33 | C35 | N32 | -6(2)      |
| C41 | C42 | C43 | C44 | 177.0(14) | C36 | C34 | C33 | C32 | 121.6(19)  |
| N31 | C32 | C33 | C34 | -57.4(17) | C25 | N22 | C24 | C26 | 0(2)       |
| N22 | C24 | C23 | C22 | -52(2)    | C25 | N22 | C24 | C23 | 178.1(17)  |
| N21 | C22 | C23 | C24 | -55.2(18) | C35 | N33 | C36 | C34 | 4(2)       |
| C26 | N23 | C25 | N22 | 2(2)      | C35 | N32 | C34 | C33 | 175.5(16)  |
| C26 | C24 | C23 | C22 | 125(2)    | C35 | N32 | C34 | C36 | -3(2)      |

## 2. Non-valent interactions details

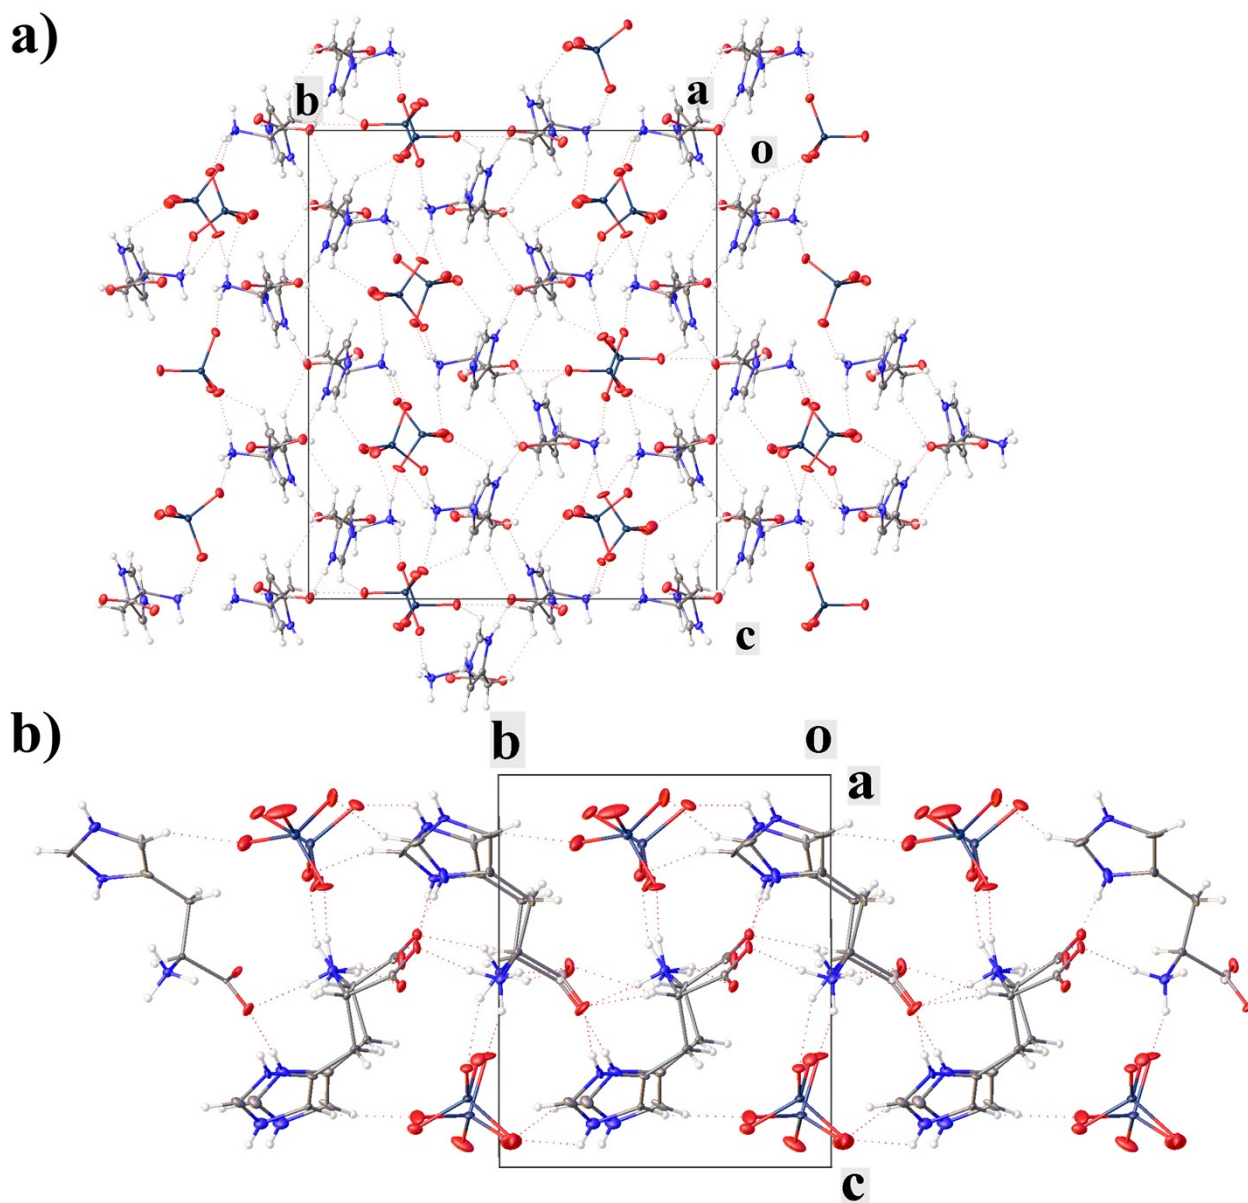

**Figure S1.** Crystal packing of **1** (a) and **2** (b) showing cationic and anionic columns.

**Table S9.**  $M \cdots O$  ( $M = \text{Mn}, \text{Re}$ ) distances and formulas of compounds containing  $\text{C}-\text{O} \cdots \text{M}$  interactions.

| NAME   | DIST<br>$M \cdots O$ | formula                                                                                                                                                                                                                        |
|--------|----------------------|--------------------------------------------------------------------------------------------------------------------------------------------------------------------------------------------------------------------------------|
| NAPWEK | 3.329                | $\text{C}_5 \text{H}_{12} \text{N}_1 \text{O}_2 1+, \text{O}_4 \text{Re} 1-, \text{H}_2 \text{O} 1$                                                                                                                            |
| YATVEY | 3.237                | $4(\text{K} 1+), 6(\text{Na} 1+), n(\text{C}_{48} \text{H}_{24} \text{Cu}_8 \text{Mn}_{13} \text{O}_{80} 9-), 0.5(\text{C}_1 \text{H}_1 \text{O}_2 1-), 0.5(\text{C}_2 \text{H}_3 \text{O}_2 1-), 19.5(\text{H}_2 \text{O} 1)$ |
| YATVEY | 2.512                | $4(\text{K} 1+), 6(\text{Na} 1+), n(\text{C}_{48} \text{H}_{24} \text{Cu}_8 \text{Mn}_{13} \text{O}_{80} 9-), 0.5(\text{C}_1 \text{H}_1 \text{O}_2 1-), 0.5(\text{C}_2 \text{H}_3 \text{O}_2 1-), 19.5(\text{H}_2 \text{O} 1)$ |
| YATVEY | 2.465                | $4(\text{K} 1+), 6(\text{Na} 1+), n(\text{C}_{48} \text{H}_{24} \text{Cu}_8 \text{Mn}_{13} \text{O}_{80} 9-), 0.5(\text{C}_1 \text{H}_1 \text{O}_2 1-), 0.5(\text{C}_2 \text{H}_3 \text{O}_2 1-), 19.5(\text{H}_2 \text{O} 1)$ |
| YATVEY | 2.563                | $4(\text{K} 1+), 6(\text{Na} 1+), n(\text{C}_{48} \text{H}_{24} \text{Cu}_8 \text{Mn}_{13} \text{O}_{80} 9-), 0.5(\text{C}_1 \text{H}_1 \text{O}_2 1-), 0.5(\text{C}_2 \text{H}_3 \text{O}_2 1-), 19.5(\text{H}_2 \text{O} 1)$ |

|        |       |                                                                                             |
|--------|-------|---------------------------------------------------------------------------------------------|
| YATVEY | 2.474 | 4(K1 1+),6(Na1 1+),n(C48 H24 Cu8 Mn13 O80 9-),0.5(C1 H1 O2 1-),0.5(C2 H3 O2 1-),19.5(H2 O1) |
| YATVEY | 3.138 | 4(K1 1+),6(Na1 1+),n(C48 H24 Cu8 Mn13 O80 9-),0.5(C1 H1 O2 1-),0.5(C2 H3 O2 1-),19.5(H2 O1) |
| YATVEY | 2.55  | 4(K1 1+),6(Na1 1+),n(C48 H24 Cu8 Mn13 O80 9-),0.5(C1 H1 O2 1-),0.5(C2 H3 O2 1-),19.5(H2 O1) |
| YATVEY | 2.651 | 4(K1 1+),6(Na1 1+),n(C48 H24 Cu8 Mn13 O80 9-),0.5(C1 H1 O2 1-),0.5(C2 H3 O2 1-),19.5(H2 O1) |
| YATVEY | 2.499 | 4(K1 1+),6(Na1 1+),n(C48 H24 Cu8 Mn13 O80 9-),0.5(C1 H1 O2 1-),0.5(C2 H3 O2 1-),19.5(H2 O1) |
| YATVEY | 2.609 | 4(K1 1+),6(Na1 1+),n(C48 H24 Cu8 Mn13 O80 9-),0.5(C1 H1 O2 1-),0.5(C2 H3 O2 1-),19.5(H2 O1) |
| YATVIC | 3.193 | 4(K1 1+),6(Na1 1+),n(C48 H24 Cu8 Mn13 O80 9-),0.5(C1 H1 O2 1-),0.5(C2 H3 O2 1-),22.4(H2 O1) |
| YATVIC | 2.521 | 4(K1 1+),6(Na1 1+),n(C48 H24 Cu8 Mn13 O80 9-),0.5(C1 H1 O2 1-),0.5(C2 H3 O2 1-),22.4(H2 O1) |
| YATVIC | 2.5   | 4(K1 1+),6(Na1 1+),n(C48 H24 Cu8 Mn13 O80 9-),0.5(C1 H1 O2 1-),0.5(C2 H3 O2 1-),22.4(H2 O1) |
| YATVIC | 2.475 | 4(K1 1+),6(Na1 1+),n(C48 H24 Cu8 Mn13 O80 9-),0.5(C1 H1 O2 1-),0.5(C2 H3 O2 1-),22.4(H2 O1) |
| YATVIC | 2.499 | 4(K1 1+),6(Na1 1+),n(C48 H24 Cu8 Mn13 O80 9-),0.5(C1 H1 O2 1-),0.5(C2 H3 O2 1-),22.4(H2 O1) |
| AVAYAY | 2.571 | (C48 H24 Mn3 N6 O12)n                                                                       |
| AVAYAY | 2.571 | (C48 H24 Mn3 N6 O12)n                                                                       |
| CUFFAM | 3.495 | (C24 H28 Mn3 N2 O22)n                                                                       |
| CUFFAM | 3.495 | (C24 H28 Mn3 N2 O22)n                                                                       |
| DEGXEV | 3.506 | C12 H12 N2 Np1 O15 Re2                                                                      |
| DEGXEV | 3.036 | C12 H12 N2 Np1 O15 Re2                                                                      |
| HEBMIM | 2.594 | (C43 H34 Mn3 N2 O15)n,2n(H2 O1)                                                             |
| JUVWUU | 3.422 | (C16 H15 Mn1 N1 O5)n                                                                        |
| KUGTAK | 2.656 | C66 H66 Mn2 O34 P2 Ti6                                                                      |
| KUGTAK | 2.656 | C66 H66 Mn2 O34 P2 Ti6                                                                      |
| NAFCAB | 3.334 | C3 H8 N1 O2 1+,O4 Re1 1-                                                                    |
| PAPKIB | 3.318 | (C96 H48 Mn6 N12 O25 2-),2n(H1 1+),2.5n(H2 O1)                                              |
| POMKUY | 3.347 | C2 H5 N1 O2,C2 H6 N1 O2 1+,O4 Re1 1-                                                        |
| YELTUH | 2.679 | (C14 H10 Mn1 N2 Ni1 O10)n                                                                   |
| ZEVVUU | 2.673 | (C14 H10 Co1 Mn1 N2 O10)n                                                                   |
| IYOHUC | 3.037 | 2(H12 Mn1 O6 2+),H8 Mn1 O4 2+,2(C30 H54 Au3 Co2 N6 O12 S6 3-)                               |

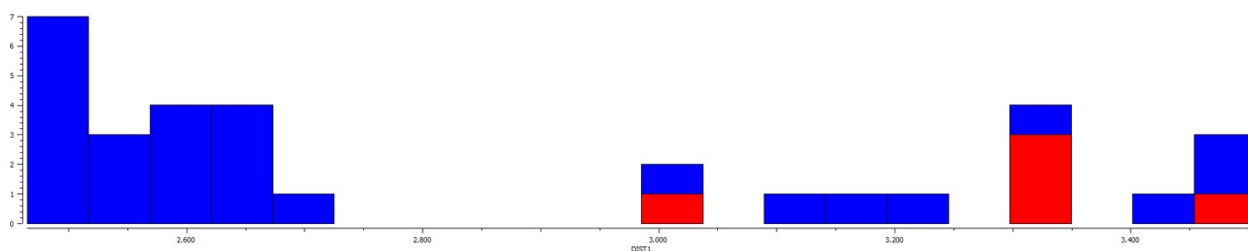

**Figure S2.** Diagram showing the distribution of M...O distances (Å) in C-O...M interactions in structures with rhenium (red) and manganese (blue).
